# Supplementary material
Source: Springer Nature journal article supplement (https://www.springerprofessional.de/resource/supplementary/13677_2012_9_MOESM2_ESM.pdf/10743424)
Supplement: MOESM2 [file 10743424]

Network Firewall

SSL/TLS

VPN

Federation Server

Web UI

Web Server

System Firewall

BLAST

Processing Engine

Secured Hadoop Cluster

Access Control Lists

Encryption

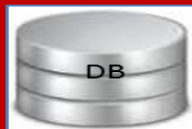

Public  
Data

Private  
Data
